# Supplementary material for: A single-stranded {Gd18} nanowheel with a symmetric polydentate diacylhydrazone ligand
Source: Royal Society of Chemistry journal article supplement (doi:10.1039/c6cc02208a), 2016-01-01
Supplement: c6cc02208a1.pdf [file c6cc02208a1.pdf]

## Electronic Supplementary Information

# A single-stranded {Gd<sub>18</sub>} nanowheel with symmetric polydentate diacylhydrazone ligand

Kai Wang,<sup>a</sup> Zi-Lu Chen,<sup>b</sup> Hua-Hong Zou,<sup>b</sup> Kun Hu,<sup>b</sup> Hai-Ye Li,<sup>b</sup> Zhong Zhang,<sup>b</sup>

Wei-Yin Sun,<sup>c</sup> Fu-Pei Liang<sup>\*a,b</sup>

### Table of the content

1. General Materials and Methods
2. X-ray Structure Determination
3. Table S1. Crystal data and structure refinement parameters for **1**.
4. Synthesis of H<sub>4</sub>ovpho.
5. Scheme S1. Synthetic route of H<sub>4</sub>ovpho.
6. Synthesis of **1**.
7. Fig. S1. The asymmetry unit of **1**.
8. Table S2. The coordination environments, geometries and donors of Gd<sup>3+</sup> ions in **1**.
9. Fig. S2. The coordination modes of ovpho<sup>4-</sup> (a) and OAc<sup>-</sup> ions (b-d) in **1**.
10. Fig. S3. The building units of **1**.
11. Fig. S4. The arrangement of six ligands in **1**.
12. Fig. S5. The *D*<sub>3d</sub> symmetry structure of **1** in a side-view.
13. Fig. S6. Crystal packing diagram of the Gd-O cores of **1**.
14. Fig. S7. The  $\chi_m T$ -*T* plot for **1**.
15. Fig. S8. The  $\chi_m^{-1}$ -*T* plot for **1**.
16. Fig. S9. The plot of *M*-*H* for **1** in the field range of 0-50 kOe at 2-8 K.
17. Table S3. Selected bond lengths (Å) and angles (°) for **1**.
18. References

---

<sup>a</sup> Guangxi Key Laboratory of Electrochemical and Magnetochemical Functional Materials, College of Chemistry and Bioengineering, Guilin University of Technology, Guilin, 541004, China. E-mail address: [fliangoffice@yahoo.com](mailto:fliangoffice@yahoo.com) (F. Liang)

<sup>b</sup> State Key Laboratory for the Chemistry and Molecular Engineering of Medicinal Resources, School of Chemistry and Pharmacy, Guangxi Normal University, Guilin, 541004, China.

<sup>c</sup> Coordination Chemistry Institute, State Key Laboratory of Coordination Chemistry, School of Chemistry and Chemical Engineering, Nanjing National Laboratory of Microstructures, Nanjing University, Nanjing, 210093, China.

## General Materials and Methods

All reagents were used as received without further purification. IR spectra were recorded in the range of 4000-400  $\text{cm}^{-1}$  on a Perkin-Elmer Spectrum One FT/IR spectrometer using a KBr pellet. Elemental microanalyses for C, H, and N were carried out on a Model 2400 II, Perkin-Elmer elemental analyzer. Magnetic susceptibility measurements were performed in the temperature range of 300-2 K using a Quantum Design MPMS SQUIDXL-5 magnetometer equipped with a 5 T magnetic field. The diamagnetic correction for the complex was estimated using Pascal's constants, and magnetic data were corrected for diamagnetic contributions of the sample holder.

## X-ray Structure Determination

All the data for **1** were collected with a Bruker SMART CCD instrument by using graphite monochromatic Mo- $K\alpha$  radiation ( $\lambda = 0.71073 \text{ \AA}$ ) at 120(2) K. Absorption effect was corrected by semi-empirical methods. The structure was solved by direct methods and was refined by full-matrix least-squares methods with SHELXL-97 crystallographic software package.<sup>S1</sup> The non-hydrogen atoms were refined anisotropically. The hydrogen atoms were placed in calculated positions and refined by using a riding model. The final cycle of full-matrix least-squares refinement was based on observed reflections and variable parameters. A summary of crystal data and relevant refinement parameters is given in Table S1. Selected bond lengths and bond angles are given in Table S3.

**Table S1.** Crystal data and structure refinement parameters for **1**.

| Identification   | <b>1</b>                                                                | Identification                | <b>1</b>        |
|------------------|-------------------------------------------------------------------------|-------------------------------|-----------------|
| Formula          | $\text{C}_{219}\text{H}_{324}\text{N}_{30}\text{O}_{147}\text{Gd}_{18}$ | $Z$                           | 6               |
| Fw               | 8559.58                                                                 | $D_c/\text{g cm}^{-3}$        | 1.504           |
| Temp/K           | 120(2)                                                                  | $m\mu/\text{mm}^{-1}$         | 3.190           |
| Crystal system   | Trigonal                                                                | $F(000)$                      | 25056           |
| Space group      | $R\bar{3}c$                                                             | Reflns collected              | 95695           |
| $a/\text{\AA}$   | 33.1977(3)                                                              | Unique reflns                 | 12353           |
| $b/\text{\AA}$   | 33.1977(3)                                                              | $R_{\text{int}}$              | 0.0963          |
| $c/\text{\AA}$   | 59.4184(8)                                                              | GOF                           | 1.160           |
| $\alpha/^\circ$  | 90.00                                                                   | $R_1, wR_2 (I > 2\sigma(I))$  | $R_1 = 0.0568$  |
| $\beta/^\circ$   | 90.00                                                                   |                               | $wR_2 = 0.1326$ |
| $\gamma/^\circ$  | 120.00                                                                  | $R_1, wR_2 (\text{all data})$ | $R_1 = 0.0786$  |
| $V/\text{\AA}^3$ | 56711.0(11)                                                             |                               | $wR_2 = 0.1545$ |

## Synthesis of H<sub>4</sub>ovpho

The synthetic route for H<sub>4</sub>ovpho is presented in Scheme S1. Starting from dimethyl 2,6-pyridinedicarboxylate, the dimethyl 2,6-pyridinedicarboxylate *N*-oxide was synthesized according to the literature.<sup>S2</sup> Subsequently, the pyridine-2,6-dicarbohydrazide *N*-oxide (2.1 g, 1 mmol) and N<sub>2</sub>H<sub>4</sub>·H<sub>2</sub>O (10 ml) was refluxed in MeOH (100 ml) at 80 °C for 12 h. The *o*-vanillin (3.0 g, 2 mmol) was then added slowly and the reaction was kept at 80 °C for another 12 h. Upon cooling and filtering, yellow solid of *N,N'*-bis(*o*-vanillidene)pyridine-2,6-dicarbohydrazide *N*-oxide (H<sub>4</sub>ovpho) was obtained with a yield of 84%. ESI-MS *m/z*: 478.14 [M-H<sup>+</sup>]. Elemental analysis Calcd. (%): C, 57.62; H, 4.41; N, 14.61%. Found: C, 57.75; H, 4.33; N, 14.54%.

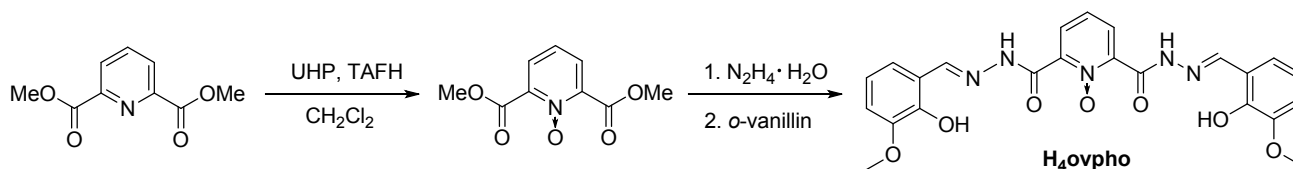

**Scheme S1.** Synthetic route of H<sub>4</sub>ovpho.

## Synthesis of 1

A mixture of Gd(OAc)<sub>3</sub>·6H<sub>2</sub>O (191 mg, 0.5 mmol), H<sub>4</sub>ovpho (24 mg, 0.05 mmol) and Et<sub>3</sub>N (0.1 mmol) in 1.5 mL CH<sub>3</sub>OH-CH<sub>3</sub>CN (*V/V* = 1/2) mixed solvent was sealed in a Pyrex tube and heated to 80 °C for 72 h. After cooled to room temperature at a rate of 0.5 °C/min, orange block-shaped crystals of **1** were obtained with a yield of 54% (based on ligand). Elemental analysis (%): calcd: C, 30.73; H, 3.82; N, 4.91; Found: C, 30.88; H, 3.93; N, 4.78. IR (KBr disk, cm<sup>-1</sup>): 3432 (vs), 2975 (w), 1615 (s), 1563 (m), 1456 (m), 1385 (m), 1216 (m), 1085 (m), 1050 (m), 946 (m), 741 (m), 669 (w), 437 (w).

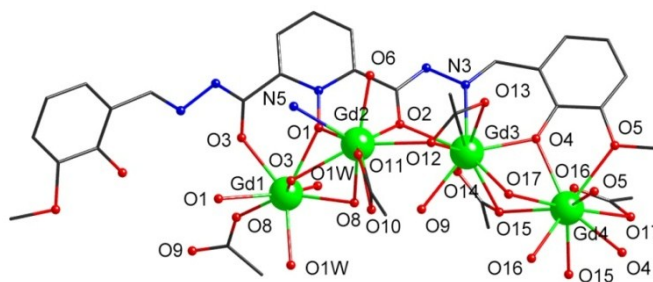

**Fig. S1.** The asymmetry unit of **1**.

**Table S2.** The coordination environments, geometries and donors of the Gd<sup>3+</sup> ions in **1**.

| No. | Coordination Environments                                                          | Coordination Gometries                           | Coordination Donors                                                                                                      |
|-----|------------------------------------------------------------------------------------|--------------------------------------------------|--------------------------------------------------------------------------------------------------------------------------|
| Gd1 | 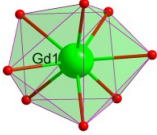  | Eight-coordinated<br>Bicapped trigonal prism     | O <sub>oxynitride</sub> , O <sub>enol</sub> ,<br>O <sub>acetate</sub> , O <sub>aqua</sub>                                |
| Gd2 |   | Nine-coordinated<br>Mono-capped square antiprism | O <sub>oxynitride</sub> , O <sub>phenol</sub> , O <sub>enol</sub> ,<br>O <sub>acetate</sub> , N <sub>acylhydrazone</sub> |
| Gd3 |   | Nine-coordinated<br>Mono-capped square antiprism | O <sub>acetate</sub> , O <sub>phenol</sub> ,<br>O <sub>enol</sub> , N <sub>acylhydrazone</sub>                           |
| Gd4 |  | Ten-coordinated<br>Bicapped dodecahedron         | O <sub>acetate</sub> , O <sub>phenol</sub> ,<br>O <sub>methoxyl</sub>                                                    |

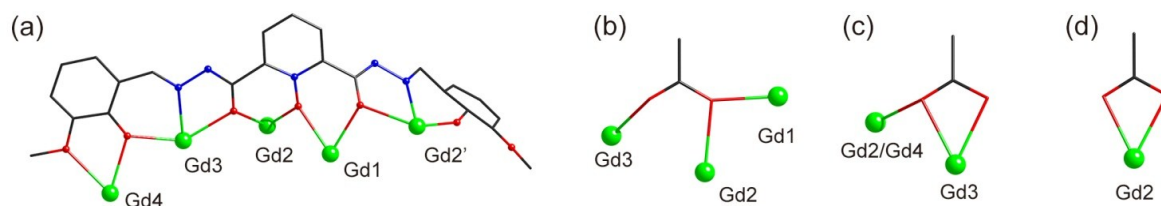

**Fig. S2.** The coordination modes of ovpho<sup>4-</sup> (a) and OAc<sup>-</sup> ions (b-d) in **1**.

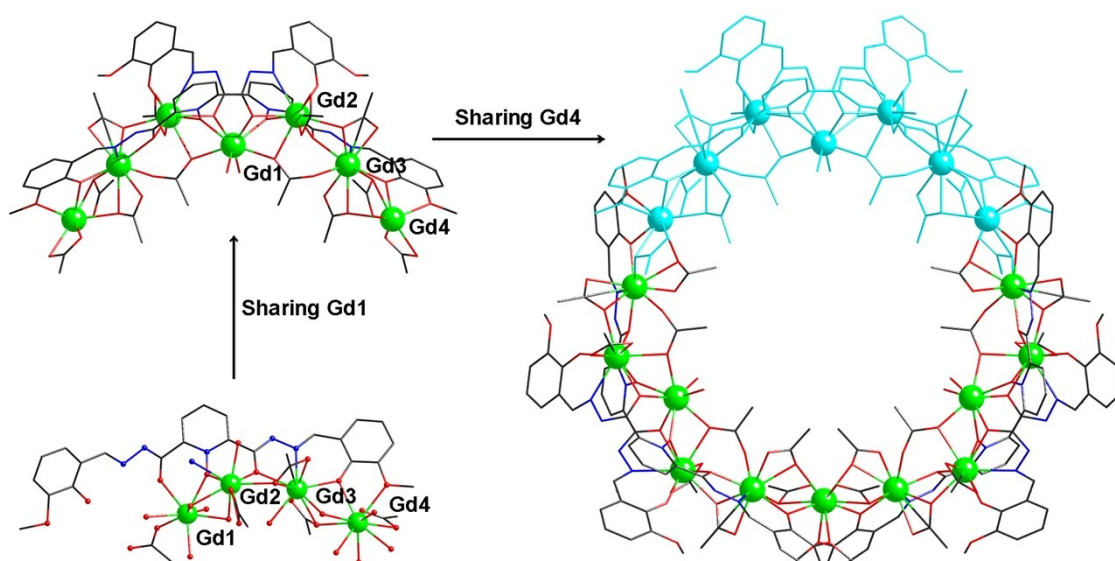

**Fig. S3.** The building units of **1**.

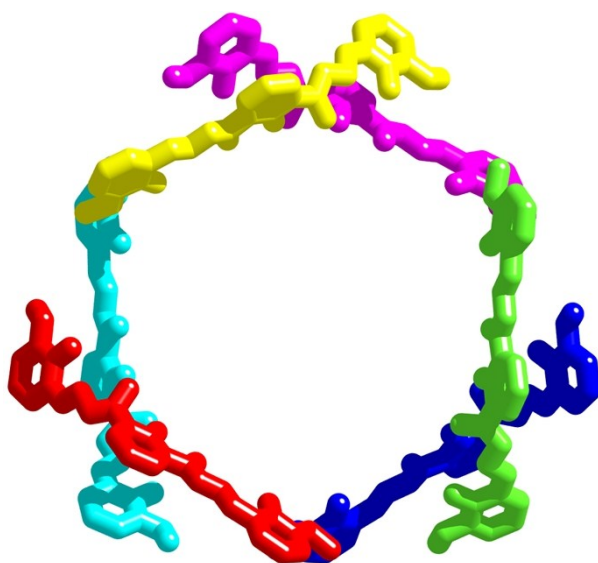

**Fig. S4.** The arrangement of six ligands in **1**.

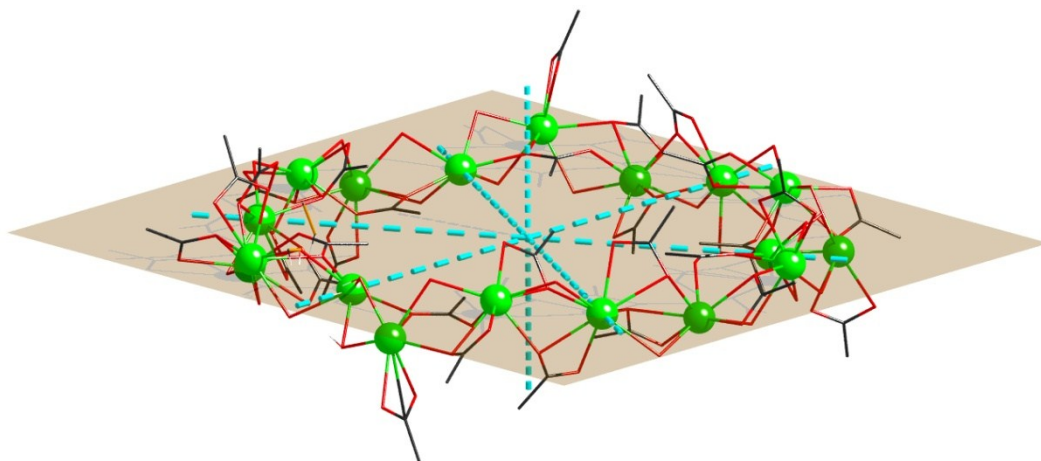

**Fig. S5.** The  $D_{3d}$  symmetry structure of **1** in a side-view.

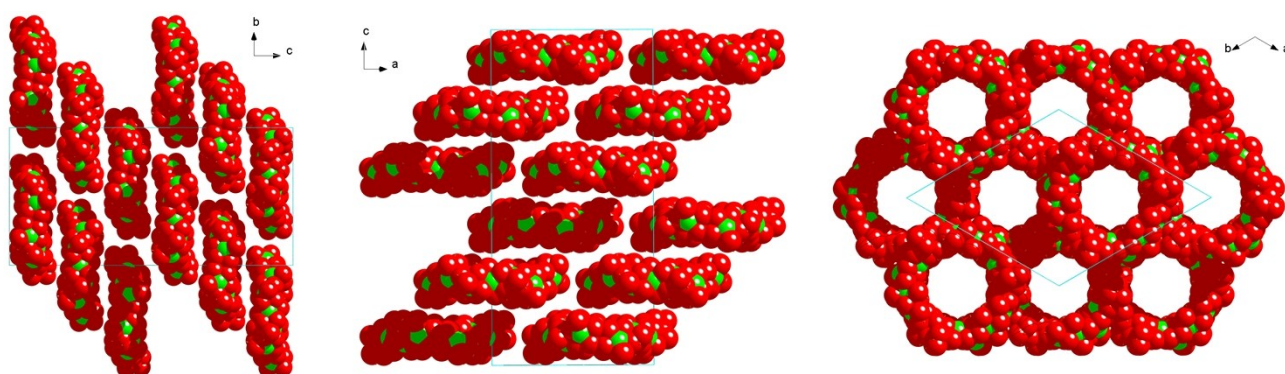

**Fig. S6.** Crystal packing diagram of the Gd–O cores of **1**.

Color code: Gd, green; O, red; cell edge, blue.

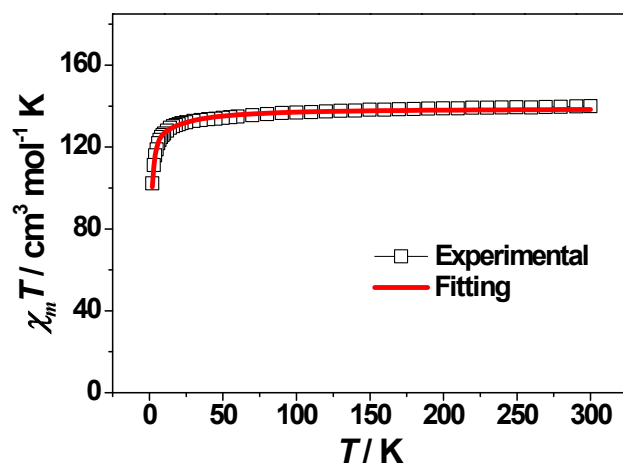

Fig. S7. The  $\chi_m T$ - $T$  plot for **1**. The red line represents the best fitting.

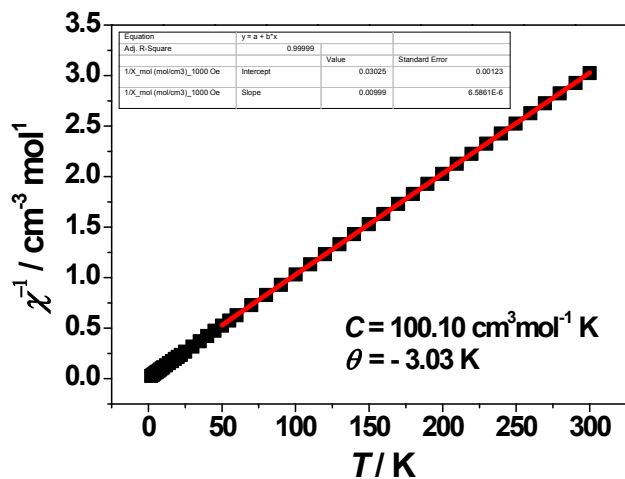

Fig. S8. The  $\chi_m^{-1}$ - $T$  plot for **1**.

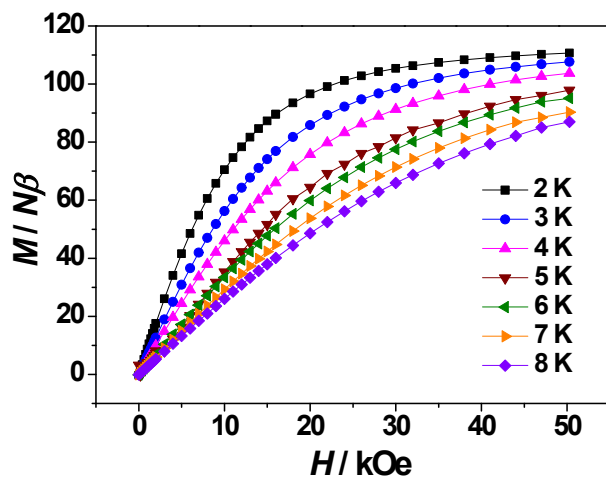

Fig. S9. The plot of  $M$ - $H$  for **1** in the field range of 0-50 kOe at 2-8 K.

**Table S3.** Selected bond lengths (Å) and angles (°) for **1**.

| Bond                    | Length (Å) | Bond                    | Length (Å) | Bond                       | Length (Å) |
|-------------------------|------------|-------------------------|------------|----------------------------|------------|
| Gd1-O8                  | 2.334 (6)  | Gd2-O10                 | 2.467 (7)  | Gd4-O15                    | 2.379 (6)  |
| Gd1-O8 <sup>i</sup>     | 2.335 (6)  | Gd2-O8 <sup>i</sup>     | 2.550 (6)  | Gd4-O4                     | 2.439 (6)  |
| Gd1-O1W <sup>i</sup>    | 2.355 (7)  | Gd2-N5 <sup>ii</sup>    | 2.552 (9)  | Gd4-O4 <sup>ii</sup>       | 2.439 (6)  |
| Gd1-O1W                 | 2.355 (7)  | Gd2-N5 <sup>i</sup>     | 2.552 (9)  | Gd4-O16 <sup>ii</sup>      | 2.482 (7)  |
| Gd1-O3 <sup>i</sup>     | 2.387 (6)  | Gd3-O4                  | 2.325 (6)  | Gd4-O16                    | 2.482 (7)  |
| Gd1-O3                  | 2.387 (6)  | Gd3-O9 <sup>i</sup>     | 2.342 (6)  | Gd4-O5                     | 2.523 (6)  |
| Gd1-O1 <sup>i</sup>     | 2.402 (6)  | Gd3-O17 <sup>ii</sup>   | 2.343 (6)  | Gd4-O5 <sup>ii</sup>       | 2.523 (6)  |
| Gd1-O1                  | 2.402 (6)  | Gd3-O2                  | 2.357 (6)  | Gd4-O17 <sup>ii</sup>      | 2.589 (7)  |
| Gd2-O6 <sup>i</sup>     | 2.236 (7)  | Gd3-O13                 | 2.462 (6)  | Gd4-O17                    | 2.589 (7)  |
| Gd2-O1                  | 2.416 (6)  | Gd3-N3                  | 2.471 (7)  | O3-Gd2 <sup>i</sup>        | 2.454 (6)  |
| Gd2-O12                 | 2.424 (6)  | Gd3-O12                 | 2.485 (6)  | O8-Gd2 <sup>i</sup>        | 2.550 (6)  |
| Gd2-O2                  | 2.449 (6)  | Gd3-O14                 | 2.506 (6)  | O9-Gd3 <sup>i</sup>        | 2.342 (6)  |
| Gd2-O3 <sup>i</sup>     | 2.454 (6)  | Gd3-O15                 | 2.534 (6)  | O17-Gd3 <sup>ii</sup>      | 2.343 (6)  |
| Gd2-O11                 | 2.464 (8)  | Gd4-O15 <sup>ii</sup>   | 2.379 (6)  | O6-Gd2 <sup>i</sup>        | 2.236 (7)  |
| N5-Gd2 <sup>i</sup>     | 2.552 (9)  |                         |            |                            |            |
| Bond Angle              | Angle(°)   | Bond Angle              | Angle(°)   | Bond Angle                 | Angle(°)   |
| Gd1-O1-Gd2              | 101.6 (2)  | Gd3-O4-Gd4              | 101.9 (2)  | Gd4-O15-Gd3                | 97.7 (2)   |
| Gd3-O2-Gd2              | 107.2 (2)  | Gd1-O8-Gd2 <sup>i</sup> | 99.6 (2)   | Gd3 <sup>ii</sup> -O17-Gd4 | 97.1 (2)   |
| Gd1-O3-Gd2 <sup>i</sup> | 100.9 (2)  | Gd2-O12-Gd3             | 104.0 (2)  |                            |            |

Symmetry codes: (i)  $y-1/3, x+1/3, -z+5/6$ ; (ii)  $-x-4/3, -x+y-2/3, -z+5/6$ .

## References

- S1. (a) G. M. Sheldrick, *SHELXS-97, Program for Crystal Structure Solution and Refinement*. University of Göttingen, **1997**; (b) G. M. Sheldrick, *SHELXL 97, Program for the Refinement of Crystal Structure*. University of Göttingen, **1997**.
- S2. S. Caron, N. M. Do and J. E. Sieser, *Tetrahedron Lett.*, 2000, **41**, 2299.
